# Supplementary material for: Bavachin and Corylifol A Improve Muscle Atrophy by Enhancing Mitochondria Quality Control in Type 2 Diabetic Mice
Source: MDPI journal article supplement (doi:10.3390/antiox12010137), 2023-01-06
Supplement: s1 [file s1]

## Supplementary Material

# Bavachin and Corylifol A Improve Muscle Atrophy by Enhancing Mitochondria Quality Control in Type 2 Diabetic Mice

MyeongHoon Yeon <sup>1</sup>, Eunhui Seo <sup>1,2</sup>, Jong-Han Lee <sup>3,\*</sup> and Hee-Sook Jun <sup>1,2,4,\*</sup>

<sup>1</sup> College of Pharmacy and Gachon Institute of Pharmaceutical Sciences, Gachon University, Incheon 21936, Republic of Korea

<sup>2</sup> Lee Gil Ya Cancer and Diabetes Institute, Gachon University, Incheon 21999, Republic of Korea

<sup>3</sup> Department of Marine Bio and Medical Science, Hanseo University, Seosan-si, 31962, Republic of Korea

<sup>4</sup> Gachon Medical Research Institute, Gil Hospital, Incheon 21565, Republic of Korea

\* Correspondence: Jong Han Lee, Department of Marine Bio and Medical Science, Hanseo University, Seosan-si, Chungcheongnam-do, 31962, Republic of Korea, E-mail: jhleecw3@hanseo.ac.kr; Hee-Sook Jun, College of Pharmacy, Gachon University, Incheon 21936, Republic of Korea, Email: hsjun@gachon.ac.kr

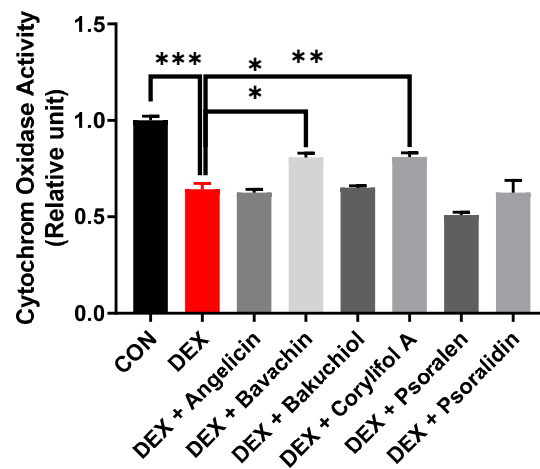

**Figure S1.** Components of *Psoralea corylifolia* L. seed increase the cytochrome C oxidase activity in Dexamethasone (DEX)-treated C2C12 myotubes. C2C12 myotubes were incubated with 1  $\mu$ M DEX, with or without 10  $\mu$ M *P. corylifolia* L. seed components (angelicin, bavachin, bakuchiol, corylifol A, psoralen, and psoralidin), for 24 h. Data are represented as the mean  $\pm$  standard error of the mean (S.E.M.). n = 3. \*\*p < 0.01, \*\*\*p < 0.001 vs. CON, one-way analysis of variance (ANOVA; Tukey).

## **Materials and Methods**

### **Measurement of Cytochrome C Oxidase (COX) Activity**

Mitochondrial respiratory chain complex IV (COX) activity was determined using a COX assay kit (ab239711; Abcam). C2C12 myotubes were incubated with 1  $\mu$ M DEX with or without 10  $\mu$ M PCS components (angelicin, bavachin, bakuchiol, corylifol A, psoralen, and psoralidin) for 24 h. Briefly, a suitable volume of mitochondrial solution containing 20  $\mu$ g of protein was added to the assay buffer in each well of a 96-well plate. After adding the reaction solution, changes in optical density values at 550 nm were recorded immediately using a kinetic program for 45 min at 1-min intervals.
